# Supplementary material for: Improving 10-deacetylbaccatin III-10-β-O-acetyltransferase catalytic fitness for Taxol production
Source: PubMed Central journal article supplement (PMC5454391; doi:10.1038/ncomms15544), 2017-05-18
Supplement: ncomms15544-s1.pdf [file ncomms15544-s1.pdf]

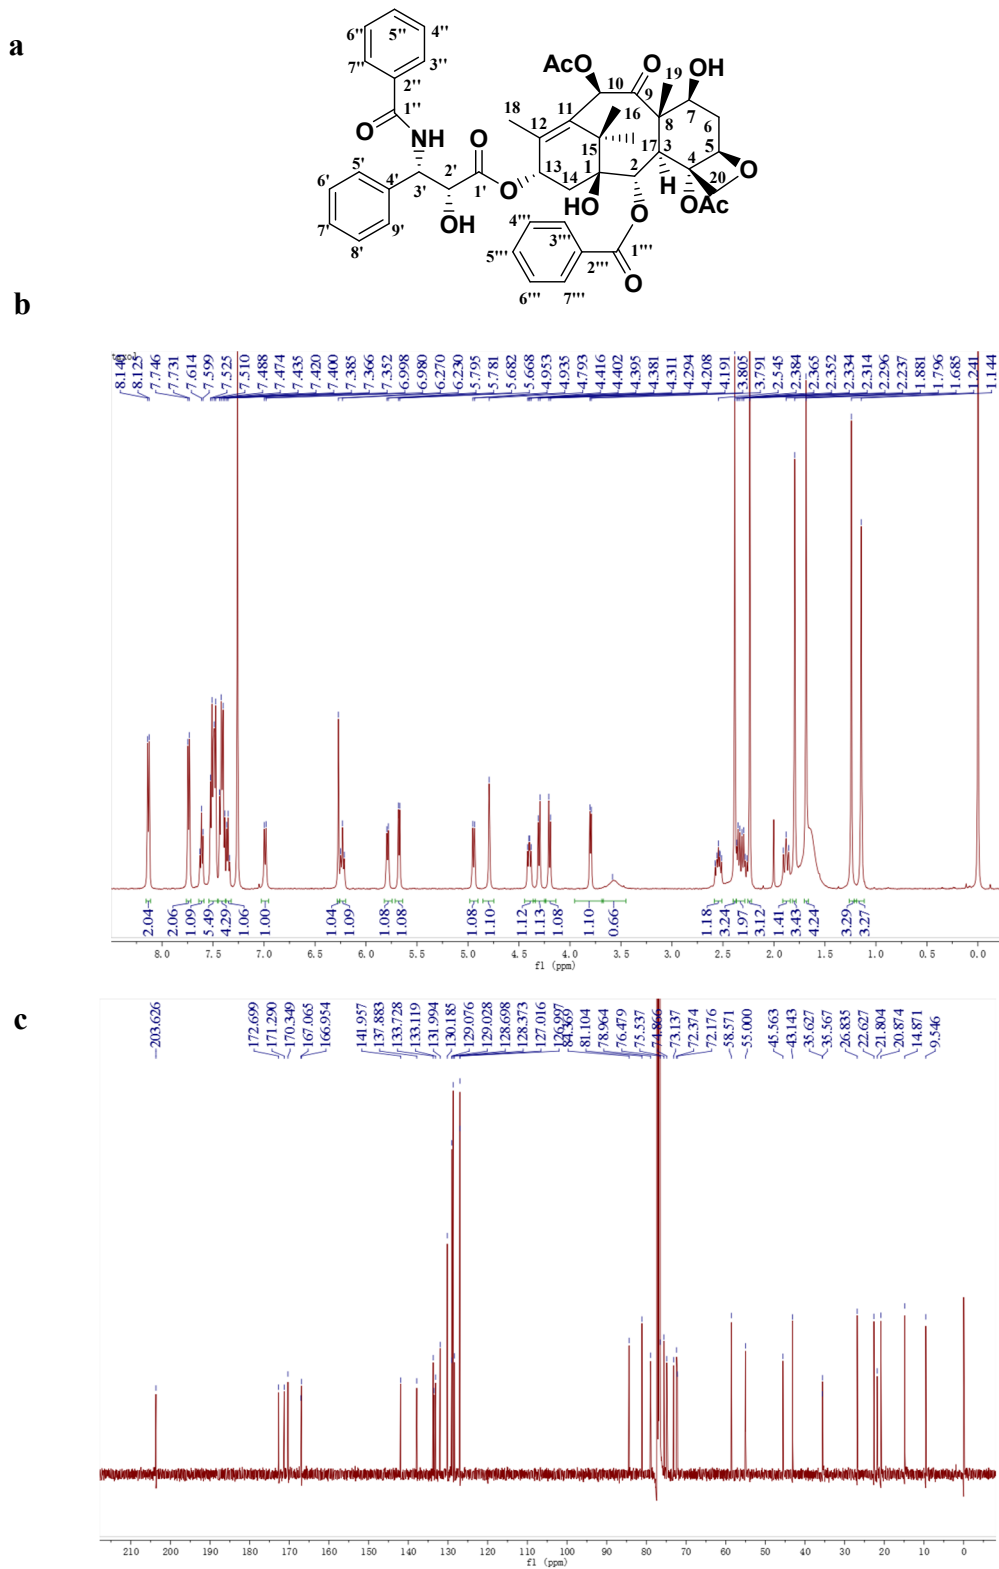

Supplementary Figure 1. The structure of Taxol and NMR spectra of the catalytic products of the recombinant DBAT (a. The structure of Taxol. b. The  $^1\text{H}$ -NMR spectrum of product. c. The  $^{13}\text{C}$ -NMR spectrum of product.). Taxol from the 50 ml reaction system was purified by HPLC then dissolved in  $\text{CDCl}_3$  and confirmed by  $^1\text{H}$ -NMR and  $^{13}\text{C}$ -NMR analysis.

**a**

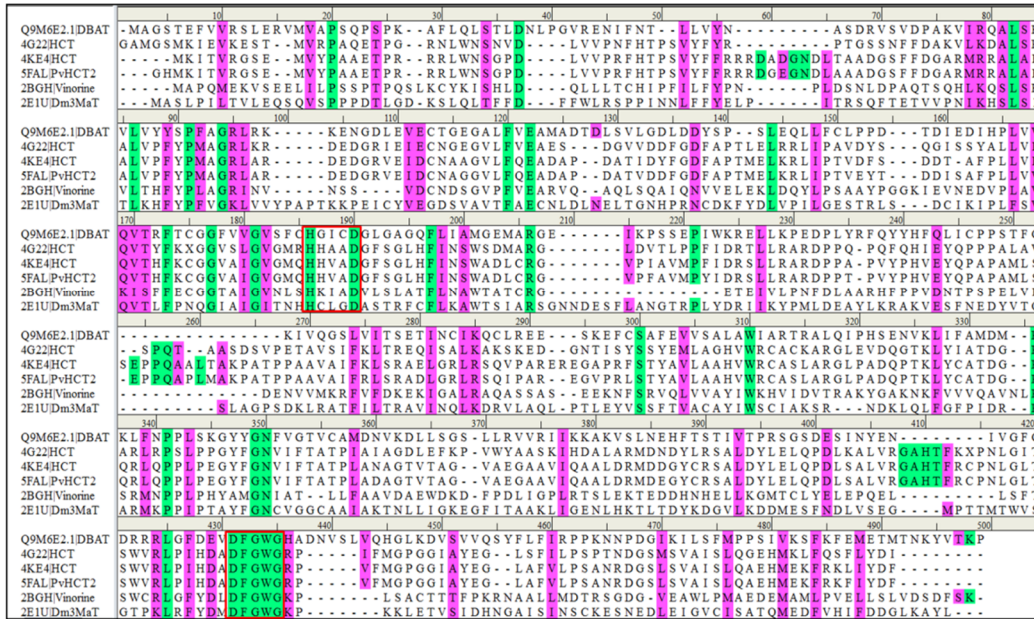

**b**

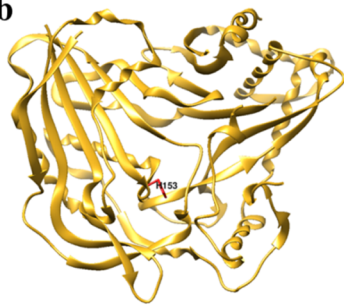

**c**

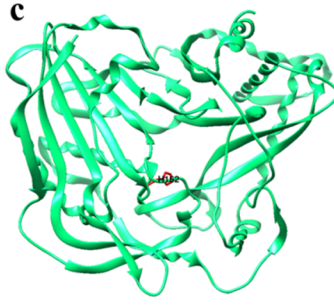

**d**

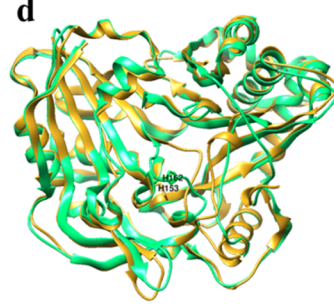

Supplementary Figure 2. Sequence and structure alignments of DBAT with other BAHD members. (a) Sequence alignment of DBAT with other BAHD members. The two conserved HXXXD and DFGWG motifs are marked in red boxes; the identical and similar residues are colored in green and pink, respectively. Accession numbers are as follows: DBAT, Q9M6E2.1; HCT, PDB: 4G22; HCT, PDB: 4KE4; PvHCT2, PDB: 5FAL; Vinorine synthase, PDB: 2BGH; Dm3MaT, PDB: 2E1U. (b) The structure of the HCT that was used as a template for DBAT homology modeling. (c) The structure of the predicted DBAT. (d) Structure alignment of DBAT with HCT (PDB: 4G22). HCT was colored in yellow, DBAT was colored in green.

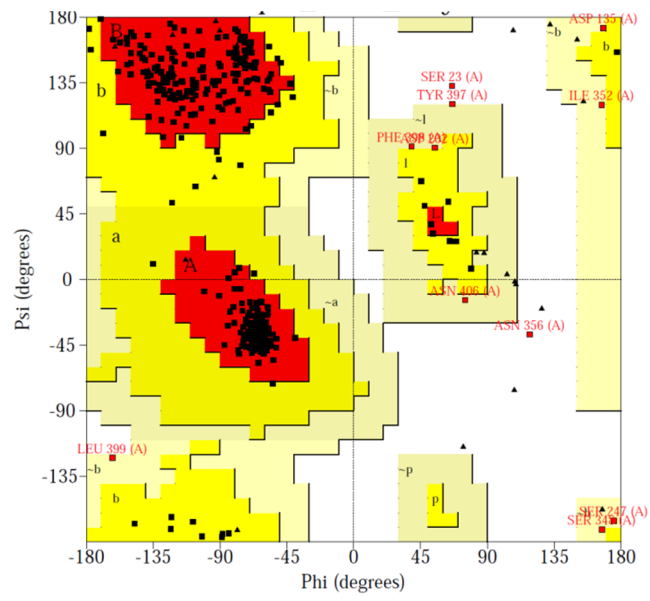

Supplementary Figure 3. Evaluation of the predicted structure of DBAT by Ramachandran plot.

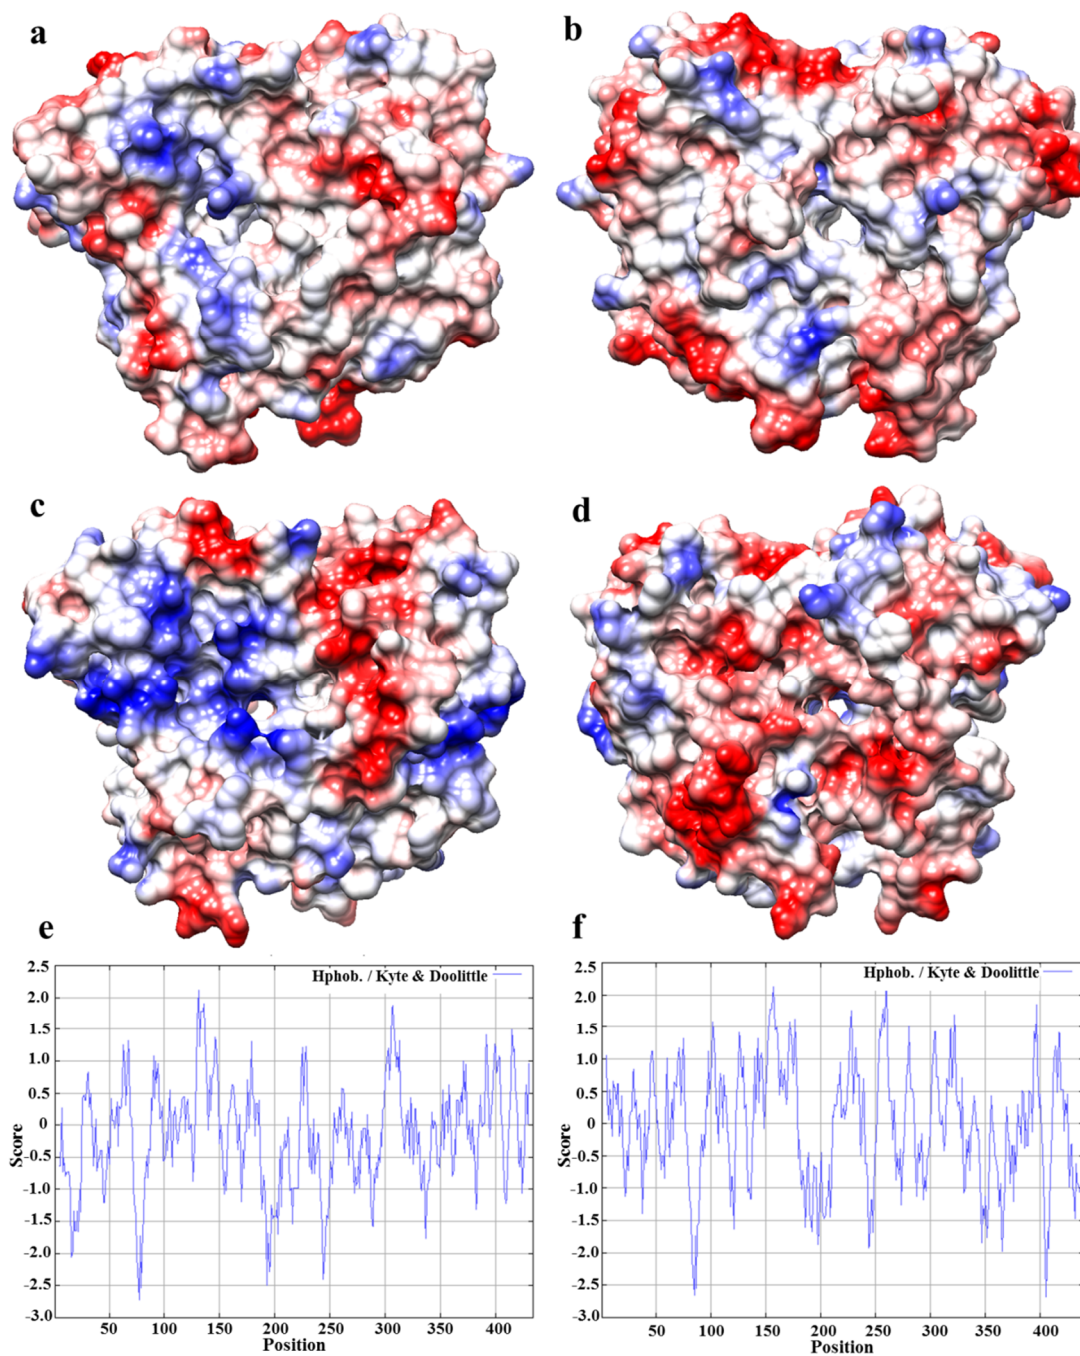

Supplementary Figure 4. Distribution of hydrophobicity and electronegativity residues in HCT and DBAT. (a) The front side of HCT. (b) The back side of HCT. (c) The front side of DBAT. (d) The back side of DBAT. (e) Electronegativity residue analysis of HCT. (f) Electronegativity residue analysis of DBAT. Residues were colored from red for negative potential, through white for near neutral, to blue for positive potential.

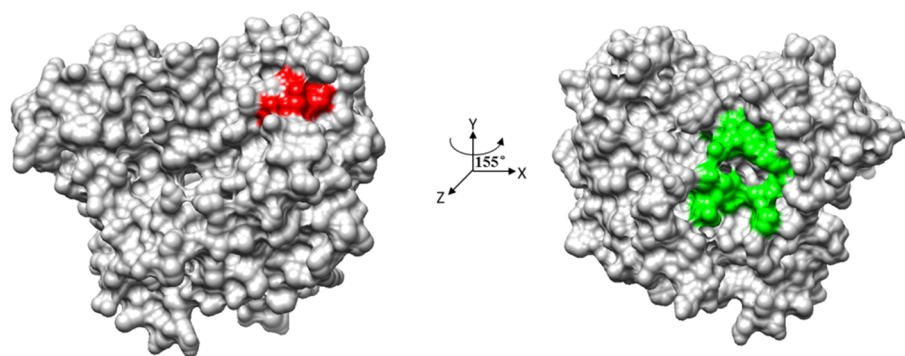

Supplementary Figure 5. The front side (left) and back side(right) of the predicted DBAT (DFGWG motif was colored in red, the predicted acyl acceptor substrate pocket was colored in green).

Supplementary Table 1. Comparison on the bioconversion of XDT to DT among different strains

| Strains                             | Substrate Concentration (mg ml <sup>-1</sup> ) | Reaction volume (ml) | XDT conversion rate (%) | DT yield (mg ml <sup>-1</sup> ) | References |
|-------------------------------------|------------------------------------------------|----------------------|-------------------------|---------------------------------|------------|
| <i>Moraxella sp.</i>                | 0.25                                           | 2                    | ~100                    | 0.23                            | [23]       |
| <i>Leifsonia shinshuensis</i>       | 0.5                                            | 2                    | ~100                    | 0.4                             | [24]       |
| <i>Enterobacter sp.</i>             | 2.0                                            | 25                   | 45                      | 0.76                            | [25]       |
| <i>Cellulosimicrobium cellulans</i> | 0.5                                            | 100                  | 91                      | 0.3~0.4                         | [26]       |
| Recombinant <i>Pichia pastoris</i>  | 15                                             | 1,000                | ~83                     | 10.58                           | [32]       |
| Recombinant <i>Pichia pastoris</i>  | 15*                                            | 10,000               | ~83                     | 9.82**                          | [32]       |

\*XDT<sub>ex</sub> (containing 71.08% XDT, 10.67% 7-β-xylosyl-10-deacetylcepholamanine and 12.05% 7-β-xylosyl-10-deacetyltaxol C, w/w). \*\*DT<sub>ex</sub> (DT, 7.54; 10-deacetylcepholamanine, 1.05; 10-deacetyltaxol C, 1.23; mg ml<sup>-1</sup>).

Supplementary Table 2. Specific activities of the six recombinant DBATs

| Enzyme activity                              | <i>Taxus cuspidata</i> | <i>Taxus brevifolia</i> | <i>Taxus x media</i> | <i>Taxus canadensis</i> | <i>Taxus baccata</i> | <i>Taxus wallichiana var.</i> |
|----------------------------------------------|------------------------|-------------------------|----------------------|-------------------------|----------------------|-------------------------------|
| (U mg <sup>-1</sup> ) (10-DAB)               | 206.6±6.7              | 214.9±15.6              | 198.7±7.5            | 41.5±8.2                | 1.1±0.4              | 215.7±8.5                     |
| (U mg <sup>-1</sup> ) ×10 <sup>-1</sup> (DT) | 2.60±0.21              | 2.64±0.10               | 1.79±0.06            | 0.38±0.04               | 0.03±0.06            | 1.82±0.06                     |

The data represent the means±s.d., n=3.

Supplementary Table 3. <sup>1</sup>H (500 MHz) and <sup>13</sup>C (125 MHz) NMR data for product ② (CDCl<sub>3</sub>)

| Position | $\delta_{\text{H,mult}}(J \text{ in Hz})$ | $\delta_{\text{C}}$ | Position                | $\delta_{\text{H,mult}}(J \text{ in Hz})$ | $\delta_{\text{C}}$ |
|----------|-------------------------------------------|---------------------|-------------------------|-------------------------------------------|---------------------|
| 1        |                                           | 78.9                | 4-O-C*OCH <sub>3</sub>  |                                           | 170.3               |
| 2        | 5.68,d (7.0)                              | 74.9                | 4-O-COC*H <sub>3</sub>  | 2.36,s                                    | 22.6                |
| 3        | 3.79,d (7.0)                              | 45.6                | 10-O-C*OCH <sub>3</sub> |                                           | 171.3               |
| 4        |                                           | 81.1                | 10-O-COC*H <sub>3</sub> | 2.28,s                                    | 20.8                |
| 5        | 4.94,dd (9.0, 2.0)                        | 84.3                | 1'                      |                                           | 172.8               |
| 6        | 2.55, m, 1.88,m                           | 35.6                | 2'                      | 4.80, brs                                 | 73.1                |
| 7        | 4.40,dd (9.0, 6.0)                        | 72.2                | 3'                      | 5.78,d (9.0, 2.0)                         | 55.0                |
| 8        |                                           | 58.6                | 4'                      |                                           | 137.9               |
| 9        |                                           | 203.6               | 5'and9'                 | 7.49,d (7.5)                              | 127.0               |
| 10       | 6.27,s                                    | 75.5                | 6'and8'                 | 7.43,t (7.5) <sup>a</sup>                 | 128.7               |
| 11       |                                           | 133.1               | 7'                      | 7.36,d (7.5)                              | 128.4 <sup>a</sup>  |
| 12       |                                           | 142.0               | 1''                     |                                           | 167.1               |
| 13       | 6.23,dd                                   | 72.4                | 2''                     |                                           | 133.5               |
| 14       | 2.31,m, 2.27,m                            | 35.7                | 3''and7''               | 7.73,d (7.5)                              | 127.1               |
| 15       |                                           | 43.2                | 4''and6''               | 7.42,t (7.5) <sup>a</sup>                 | 129.0 <sup>a</sup>  |
| 16       | 1.24,s                                    | 26.8                | 5''                     | 7.51,d (7.5) <sup>a</sup>                 | 131.9               |
| 17       | 1.14,s                                    | 21.8                | 1'''                    |                                           | 167.0               |
| 18       | 1.80,s                                    | 14.8                | 2'''                    |                                           | 128.4 <sup>a</sup>  |
| 19       | 1.69,s                                    | 9.5                 | 3'''and7'''             | 8.13,d (7.5)                              | 130.2               |
| 20       | 4.30,d(10.5),<br>(10.5)                   | 4.19,d<br>76.5      | 4'''and6'''             | 7.52,t (7.5) <sup>a</sup>                 | 129.1 <sup>a</sup>  |
| NH       | 6.98,d (9.0)                              |                     | 5'''                    | 7.61,d (7.5)                              | 133.7               |

<sup>a</sup>Overlapping signals.

Supplementary Table 4. Activities of DBAT and its mutants obtained by alanine scanning against 10-DAB and DT

|       | DT                                      |                      | 10-DAB                   |                       |
|-------|-----------------------------------------|----------------------|--------------------------|-----------------------|
|       | U mg <sup>-1</sup> (×10 <sup>-2</sup> ) | Relative activity(%) | U mg <sup>-1</sup> (×10) | Relative activity (%) |
| Con   | 26.00(±1.12)                            | 100.00               | 20.66(±0.67)             | 100.00                |
| S351A | 25.45(±1.91)                            | 97.87                | 19.56(±1.27)             | 94.69                 |
| G38A  | 37.69(±0.88)**                          | 144.95               | 18.82(±0.51)             | 91.09                 |
| S396A | 23.59(±1.32)                            | 90.72                | 18.99(±0.48)             | 91.91                 |
| R40A  | 21.06(±0.79)                            | 81.00                | 18.82(±0.96)             | 91.08                 |
| N353A | 15.28(±0.44)                            | 58.77                | 17.64(±0.22)             | 85.38                 |
| E41A  | 14.48(±0.07)                            | 55.71                | 14.81(±0.46)             | 71.70                 |
| C165A | 16.15(±0.26)                            | 62.13                | 13.16(±0.36)             | 63.68                 |
| F160A | 6.34(±0.07)                             | 24.37                | 12.50(±0.09)             | 60.49                 |
| F301A | 41.38(±1.12)**                          | 159.17               | 9.75(±0.32)              | 47.18                 |
| P37A  | 2.78(±0.02)                             | 10.71                | 8.00(±0.10)              | 38.72                 |
| F400A | 1.32(±0.02)                             | 5.07                 | 3.58(±0.02)              | 17.32                 |
| F44A  | 0.22(±0.01)                             | 0.85                 | 1.89(±0.01)              | 9.15                  |
| G359A | 2.84(±0.03)                             | 10.92                | 1.67(±0.01)              | 8.06                  |
| I164A | 0.19(±0.01)                             | 0.72                 | 0.25(±0.01)              | 1.20                  |
| G361A | ND                                      | ND                   | ND                       | ND                    |
| R363A | ND                                      | ND                   | ND                       | ND                    |

The data represent the means±s.d., *n*=3. \**P*<0.05 vs Control, \*\**P*<0.01 vs Control (Student's *t*-test). ND: Not detected.



Supplementary Table 5. Activities of Gly<sup>38</sup> saturation mutants against DT

|      | U mg <sup>-1</sup> (×10 <sup>-2</sup> ) | Relative activity (%) |
|------|-----------------------------------------|-----------------------|
| DBAT | 26.00(±1.12)                            | 100.00                |
| G38R | 56.88(±3.11)**                          | 218.77                |
| G38S | 54.42(±2.02)**                          | 209.32                |
| G38D | 49.79(±1.76)**                          | 191.52                |
| G38H | 47.01(±0.97)**                          | 180.81                |
| G38A | 41.44(±2.98)**                          | 159.38                |
| G38N | 28.40(±1.70)                            | 109.21                |
| G38T | 24.70(±0.67)                            | 95.01                 |
| G38P | 22.37(±0.16)                            | 86.04                 |
| G38M | 21.62(±0.27)                            | 83.16                 |
| G38Q | 17.37(±1.10)                            | 66.79                 |
| G38E | 16.79(±0.08)                            | 64.59                 |
| G38W | 13.21(±0.09)                            | 50.80                 |
| G38Y | 11.10(±0.04)                            | 42.68                 |
| G38V | 11.02(±0.01)                            | 42.37                 |
| G38C | 10.68(±0.10)                            | 41.07                 |
| G38I | 9.99(±0.01)                             | 38.42                 |
| G38L | 7.71(±0.04)                             | 29.66                 |
| G38F | 5.67(±0.01)                             | 21.81                 |
| G38K | ND                                      | ND                    |

The data represent the means±s.d., *n*=3. \**P*<0.05 vs Control, \*\**P*<0.01 vs Control (Student's *t*-test). ND: Not detected.

Supplementary Table 6. Activities of Phe<sup>301</sup> saturation mutants against DT

|       | U mg <sup>-1</sup> ( $\times 10^{-2}$ ) | Relative activity (%) |
|-------|-----------------------------------------|-----------------------|
| DBAT  | 26.00( $\pm 1.12$ )                     | 100.00                |
| F301V | 74.10( $\pm 8.45$ )**                   | 285.00                |
| F301C | 47.22( $\pm 3.42$ )**                   | 181.60                |
| F301A | 41.60( $\pm 1.98$ )**                   | 160.00                |
| F301M | 35.10( $\pm 1.95$ )*                    | 135.00                |
| F301L | 33.18( $\pm 1.69$ )*                    | 127.62                |
| F301T | 31.20( $\pm 1.52$ )*                    | 120.00                |
| F301S | 30.06( $\pm 1.37$ )                     | 115.62                |
| F301Y | 25.47( $\pm 1.02$ )                     | 97.96                 |
| F301G | 18.80( $\pm 0.54$ )                     | 72.30                 |
| F301R | 13.95( $\pm 0.31$ )                     | 53.67                 |
| F301H | 10.02( $\pm 0.15$ )                     | 38.52                 |
| F301W | 7.23( $\pm 0.08$ )                      | 27.79                 |
| F301I | 7.02( $\pm 0.09$ )                      | 27.00                 |
| F301K | 0.56( $\pm 0.02$ )                      | 2.16                  |
| F301P | 0.11( $\pm 0.02$ )                      | 0.41                  |
| F301D | 0.16( $\pm 0.01$ )                      | 0.60                  |
| F301Q | 0.10( $\pm 0.01$ )                      | 0.40                  |
| F301E | 0.16( $\pm 0.02$ )                      | 0.60                  |
| F301N | 0.13( $\pm 0.02$ )                      | 0.50                  |

The data represent the means $\pm$ s.d.,  $n=3$ . \* $P<0.05$  vs Control, \*\* $P<0.01$  vs Control (Student's *t*-test).

Supplementary Table 7. Yields of Taxol in the two enzyme coupled catalytic system

| Volume                                | 1 ml               | 10 ml             | 50 ml             |
|---------------------------------------|--------------------|-------------------|-------------------|
| Taxol yield ( $\mu\text{g ml}^{-1}$ ) | 657.32 $\pm$ 13.15 | 637.24 $\pm$ 5.10 | 635.35 $\pm$ 6.27 |

The data represent the means $\pm$ s.d.,  $n=3$ .

Supplementary Table 8. Cytotoxicities of Taxol and its analogues against human cancer cells (MTT method)

| Compounds | IC <sub>50</sub> ( $\mu\text{M}$ ) |          |         |        |         |
|-----------|------------------------------------|----------|---------|--------|---------|
|           | HCT116                             | NCI-H460 | MGC803  | HepG2  | MCF-7   |
| Taxol     | 0.0109                             | 0.0211   | 0.00772 | 0.0691 | 0.00930 |
| DT        | 0.0780                             | 0.482    | 0.0508  | 0.482  | 0.0972  |
| XDT       | 0.476                              | 3.22     | 0.491   | 5.42   | 3.81    |

Note: HepG2, human hepatocellular liver carcinoma cell line; MCF-7: human breast carcinoma cell line; NCI-H460: human lung carcinoma cell line; HCT116: human colon carcinoma cell line; MGC803: human stomach carcinoma cell line.

Supplementary Table 9. The gradient elution conditions for 10-DAB and baccatin III analysis

| Time (min) | Acetonitrile (%) | Water (%) |
|------------|------------------|-----------|
| 0          | 28               | 72        |
| 15         | 40               | 60        |
| 30         | 40               | 60        |
| 33         | 100              | 0         |
| 43         | 100              | 0         |
| 46         | 28               | 72        |
| 51         | 28               | 72        |

Supplementary Table 10. The gradient elution conditions for XDT, DT and Taxol analysis

| Time (min) | Acetonitrile (%) | Water (%) |
|------------|------------------|-----------|
| 0          | 28               | 72        |
| 15         | 40               | 60        |
| 16         | 44               | 56        |
| 26         | 44               | 56        |
| 36         | 48               | 52        |
| 38         | 100              | 0         |
| 48         | 100              | 0         |
| 49         | 28               | 72        |
| 59         | 28               | 72        |

Supplementary Table 11. The linear equations of baccatin III, DT and Taxol

|              | Linear equations  | Correlation coefficient |
|--------------|-------------------|-------------------------|
| Baccatin III | $Y=43291X+35693$  | $R^2=0.9999$            |
| DT           | $Y=66664X+175819$ | $R^2=0.9995$            |
| Taxol        | $Y=148089X+41221$ | $R^2=0.9996$            |

Supplementary Table 12. Primer sequences. The primers were used for construction the alanine mutants and saturation mutants

| Primers | Sequences (5'→3', the corresponding mutant bases were labeled underlined) |
|---------|---------------------------------------------------------------------------|
| 37 AF   | TGACAATCTAG <u>C</u> AGGGGTGAG                                            |
| 37 AR   | CTCTACCCCT <u>G</u> CTAGATTGT                                             |
| 38AF    | GACAATCTACCAG <u>C</u> GGTGAGAG                                           |
| 38AR    | TTTTCTCTAC <u>C</u> GCTGGTAGA                                             |
| 40AF    | CCAGGGGTG <u>G</u> CAGAAAACATT                                            |
| 40AR    | AAATGTTTTCT <u>G</u> CCACCCCTG                                            |
| 41AF    | CAGGGGTGAGAG <u>C</u> AAACATTT                                            |
| 41AR    | AAAATGTTT <u>G</u> CTCTCACCCTG                                            |
| 44AF    | AGAAAACATT <u>G</u> CTAACACCTTG                                           |
| 44AR    | AAGGTGTTA <u>G</u> CAATGTTTTCT                                            |
| 160AF   | GGTGAGT <u>G</u> CCTGCCATGGTATATG                                         |
| 160AR   | CCATGGCAG <u>G</u> CACTACCCCTAC                                           |
| 162AF   | TTTCTG <u>C</u> GCTGGTATATGTGATG                                          |
| 162AR   | CATATACCAG <u>C</u> GCAGAAACTCACC                                         |
| 164AF   | CCATGGT <u>G</u> CATGTGATGGACTAG                                          |
| 164AR   | CATCACAT <u>G</u> CACCATGGCAGAAAC                                         |
| 165AF   | CATGGTATAG <u>C</u> TGATGGACTAGG                                          |
| 165AR   | AGTCCATCAG <u>C</u> TATACCATGGCAG                                         |
| 301A F  | GGATACTACGGTAAT <u>G</u> CTGTTGG                                          |
| 301A R  | ATACGGTACCAACAG <u>C</u> ATTACC                                           |
| 351AF   | TCAGATGAG <u>G</u> CTATCAATTATG                                           |
| 351AR   | TAATTGATAG <u>C</u> CTCATCTGATC                                           |
| 353AF   | TGAGAGTATC <u>G</u> CTTATGAAAAC                                           |
| 353AR   | TGTTTTCATAAG <u>C</u> GATACTCTC                                           |
| 359AF   | AACATAGTT <u>G</u> CA <sup>1</sup> TTTGGTGAT                              |
| 359AR   | CACCAAAT <u>G</u> CAACTATGTTTTCA                                          |
| 361AF   | GTTGGATTT <u>G</u> CTGATCGAAG                                             |
| 361AR   | CCTTCGATCAG <u>C</u> AAATCCAAC                                            |
| 363AF   | TTTGGTGAT <u>G</u> CAAGGCGATTG                                            |
| 363AR   | AATCGCCTT <u>G</u> CATCACCAAATC                                           |
| 396AF   | AGTCGTGCAAG <u>C</u> TATTTTCTTTTC                                         |
| 396AR   | GAAAATAAG <u>C</u> TGACGACTGAAAC                                          |
| 400AF   | TATTTTCTT <u>G</u> CCATACGACCTCC                                          |
| 400AR   | GAGGTCGTAT <u>G</u> GCAAGAAAATAAC                                         |
| 38NF    | TACCANN <u>K</u> GTGAGAGAAAACATT                                          |
| 38NR    | TCTCTCAC <u>M</u> NNTGGTAGATTGTC                                          |
| 301NF   | CGGTAAT <u>N</u> NKGTTGGTACCGTATG                                         |
| 301NR   | GTACCAAC <u>M</u> N <sup>1</sup> NATTACCGTAGTAT                           |
